# Supplementary material
Source: Research Square preprint supplement (doi:10.21203/rs.3.rs-10247519/v1)
Supplement: Supplementary file 1 [file 74ef933eecb64d612231bb80.docx]

Supplementary Figure 1. Estimated genome size of enset (*Ensete ventricosum*) landrace Mazia as inferred by findGSE

Supplementary Figure 2. Functional annotation of protein coding genes for enset (*Ensete ventricosum*) landrace Mazia (top) and Bedadeti (bottom)


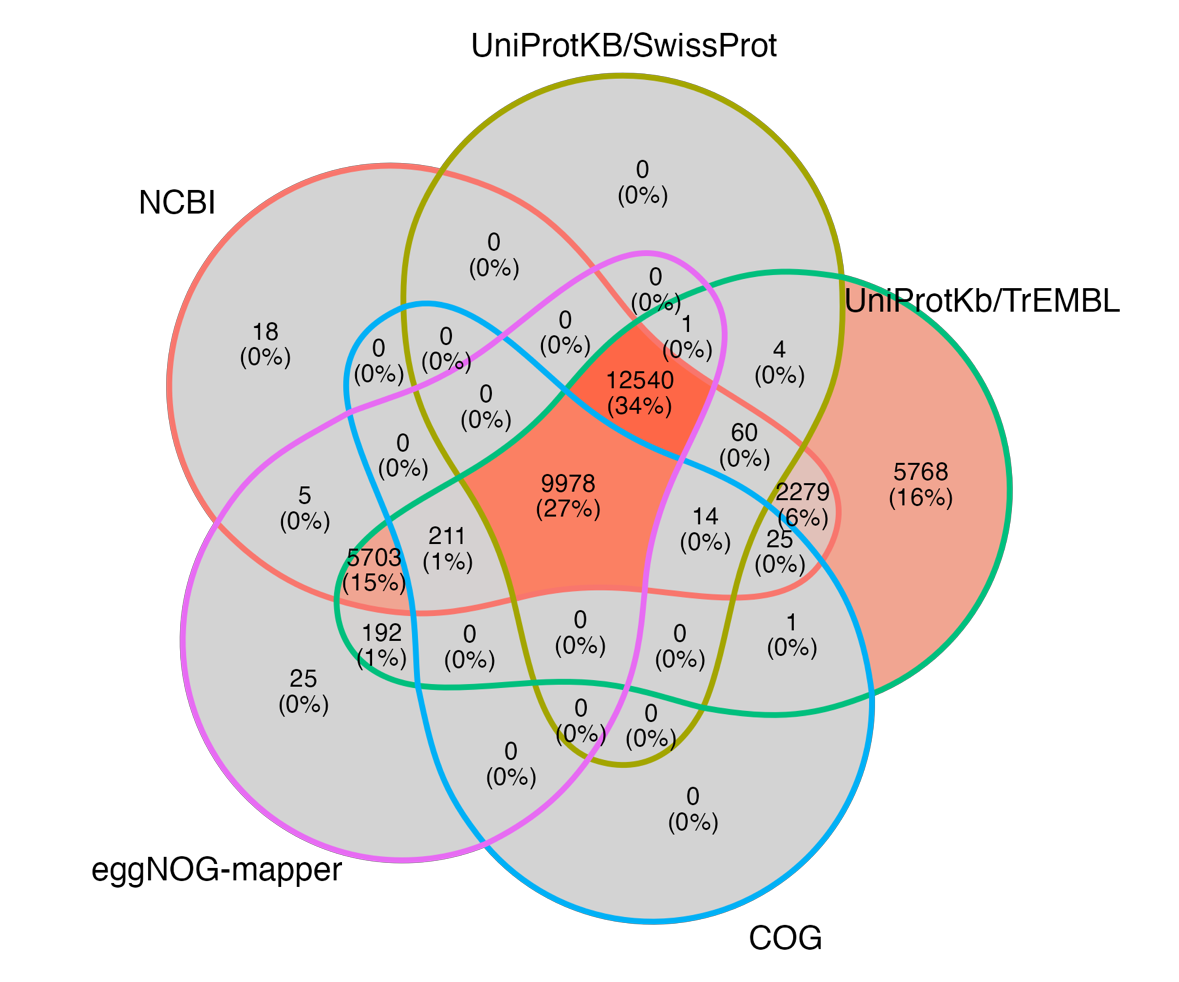


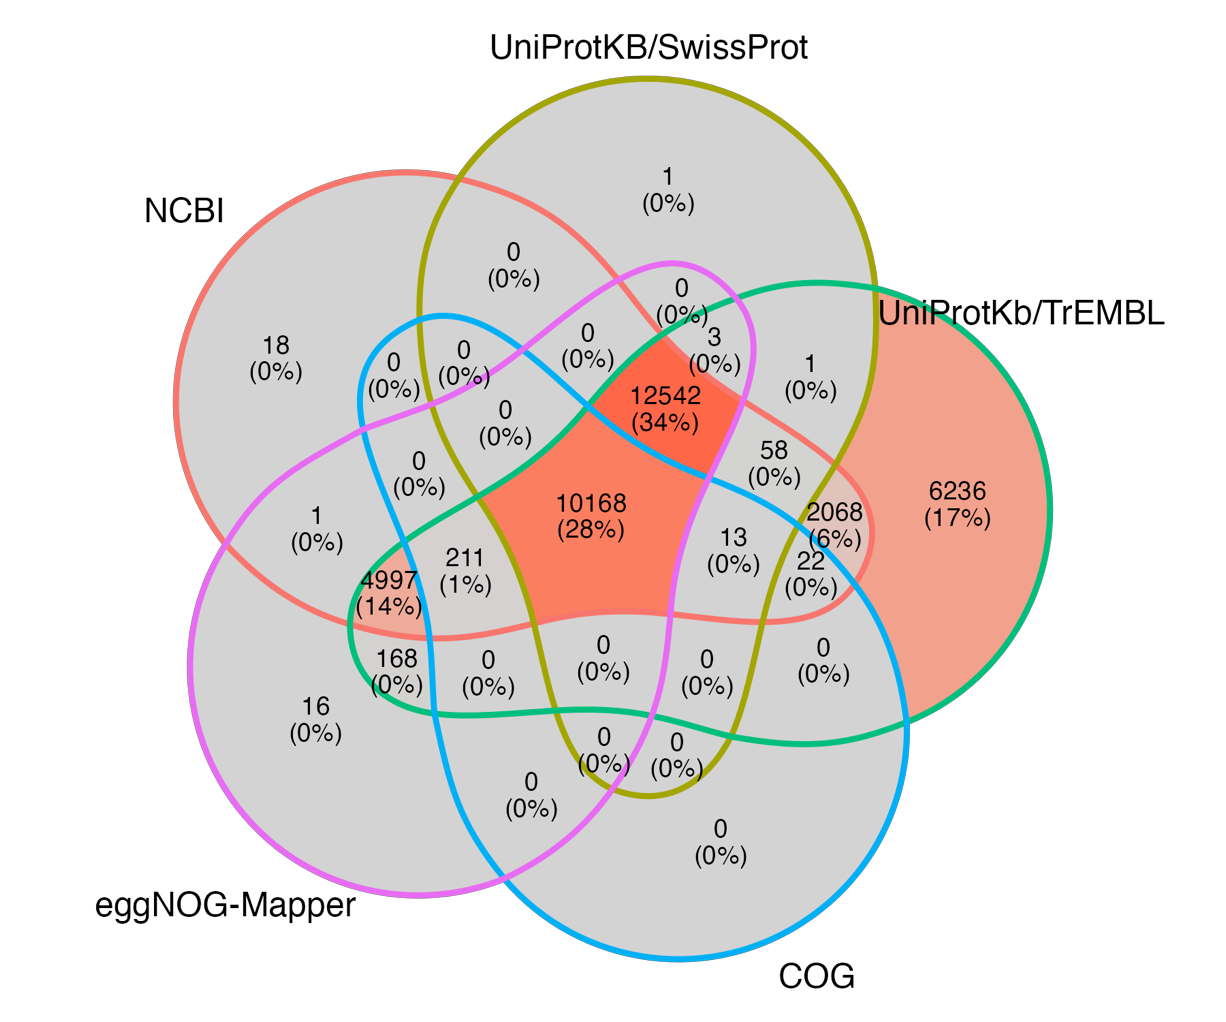


Supplementary Figure 3. Data workflow to identify enset (*E. ventricosum*) specific protein coding genes using genomic reads mapping and coding sequences alignment

Supplementary Figure 3. Data workflow to identify enset (*E. ventricosum*) specific protein coding genes using genomic reads mapping and coding sequences alignment (continued)

Supplementary Figure 4. Data workflow to identify *M. acuminata* (MA) and *M. balbisiana* (MB) specific protein coding genes using genomic reads mapping and coding sequences alignment

Supplementary Figure 4. Data workflow to identify *M. acuminata* (MA) and *M. balbisiana* (MB) specific protein coding genes using genomic reads mapping and coding sequences alignment (continued)

Supplementary Figure 5. Predicted NLR loci distribution in *Musa acuminata* and *Musa balbisiana* genomes

Supplementary Figure 6. Predicted NLR loci distribution in selected contig of enset (*Ensete ventricosum*) landrace Mazia and Bedadeti selected genomes

Supplementary Figure 7. Summary of NLR domain architechture prediction from genomic sequence and protein coding genes in enset (*Ensete ventricosum*) landrace Mazia and Bedadeti, Musa species (*Musa acuminata* and *Musa balbisiana*)
