# Supplementary material
Source: Research Square preprint supplement (doi:10.21203/rs.3.rs-10247519/v1)
Supplement: Supplementary file 2 [file cdaa096173dd498b24b486b4.xlsx]

## Sheet: Stable_1
Supplementary Table 1. Repeat contents enset genomes from two landraces (RepeatMasker)
Retroelements	Mazia	Bedadeti
LINEs	0.00160341	0.0030405
Ty1/Copia	0.157407	0.190572
Gypsy/DIRS1	0.134264	0.138919
Unknown	0.0917299	0.0836776
DNA transposons
CACTA	0.016113	1.441e-05
Mutator	0.0570457	8.62495e-05
PIF_Harbinger	0.00256839	5.40679e-07
Tc1_Mariner	0.00252307	0.00117627
hAT	0.0146522	6.84713e-07
helitron	0.00656067	0.0187438
other	0.00976401	0.0189856
Unclassified	0.195387	0.0619515
Total interspersed	0.689618	0.517169

## Sheet: Stable_2
		Supplementary Table 2. Genomic reads of enset (E. ventricosum) landraces used in the study
		No	Genotypes or landraces	Species*	Cutivated/wild		Number of bases (Gb)	SRA sample	BioProject
		1	Arkiya	EV	Cutivated		4.8	SRR4304969, SRR4304970	PRJNA344540
		2	Cultivar ITC1387	EV	NA		15.9	ERR10695598	PRJEB58004
		3	Arkiya	EV	Cultivated		5	SRR4304981, SRR4304987	PRJNA344540
		4	Astara	EV	Cultivated		4.3	SRR4304989	PRJNA344540
		5	Bedadeti	EV	Cultivated		18.3	SRR1515268, SRR1515269	PRJNA252658
		6	Buffero	EV	Cultivated		5	SRR4304990	PRJNA344540
		7	Derea	EV	Cultivated		25.2	SRR4308285, SRR4308286	PRJNA344540
		8	Lochingie	EV	Cultivated		5.4	SRR4304974, SRR4304975	PRJNA344540
		9	Mazia	EV	Cultivated		4.9	SRR4304976, SRR4304977	PRJNA344540
		10	Mazia	EV	Cultivated		5.2	SRR4304978, SRR4304979	PRJNA344540
		11	Mazia (Current study)	EV	Cultivated		192.2	SRR27722736	PRJNA838108
		12	Nechuwe	EV	Cultivated		5.6	SRR4304982	PRJNA344540
		13	Nobo	EV	Cultivated		4.8	SRR4304983	PRJNA344540
		14	Onjamo	EV	Cultivated		6.6	SRR4308284	PRJNA344540
		15	Siyuti	EV	Cultivated		4.6	SRR4304984	PRJNA344540
		16	Yako	EV	Cultivated		4.9	SRR4304985	PRJNA344540
		17	Yanbule	EV	Cultivated		5.4	SRR4304986	PRJNA344540
		18	Jungle seed	EV	Wild		40.4	SRR610420	PRJNA170519
		19	Erpha 13	EV	Wild		5.7	SRR4304991, SRR4304992	PRJNA344540
		20	Erpha 20	EV	Wild		6.3	SRR4304971, SRR4304993	PRJNA344540

## Sheet: Stable_3
	Supplementary Table 3. Genomic reads of banana (Musa spp.) genotypes used in the study
No	Genotypes or landraces	Species*	Musa spp. sub-genome composition	Reads type	Number of bases (Gb)	SRA sample	BioProject
	AA or AAA type banana genotype
1	Double haploid (DH)-Pahang	MA	AA	NGS	64.4	ERR3606950, ERR3606951	PRJEB35002
2	Pisang_Kra (subsp. malaccensis)	MA	AA	NGS	17.6	SRR6996493	PRJNA432894
3	Musa acuminata subsp. malaccensis	MA	AA	NGS	20	SRR8989632	PRJNA540118
4	Musa acuminata Pisang Mas (subgroup Sucrier)	MA	AA	NGS	17	SRR6996492	PRJNA432894
5	Musa acuminata Pisang Mas (subgroup Sucrier)	MA	AA	NGS	23.8	SRR8989638	PRJNA540118
6	Musa acuminata Green-Red	MA	AA	NGS	36.7	SRR8989628, SRR9734077	PRJNA540118
7	Musa acuminata Paka	MA	AA	NGS	17.4	SRR8989629	PRJNA540118
8	Musa acuminata ‘Calypso’	MA	AA	NGS	46.1	SRR9734076	PRJNA540118								Musa x paradisiaca
9	Musa acuminata subsp. Zebrina	MA	AA	NGS	35.7	SRR8989630, SRR9734074	PRJNA540118
10	Musa acuminata; Kole	MA	AA	NGS	24.7	ERR10695600	PRJEB58004
11	Musa acuminata; Pisang Kra	MA	AA	NGS	20.4	ERR10695594	PRJEB58004
12	Musa acuminata; ssp. Banksii	MA	AA	NGS	19.3	ERR10695588	PRJEB58004
13	Musa acuminata; Higa	MA	AA	NGS	21.2	ERR10695582	PRJEB58004
14	Musa acuminata var. zebrina; Pisang Cici Alas	MA	AA	NGS	19.8	ERR10695581	PRJEB58004
15	Musa acuminata subsp. malaccensis; Malaccensis nain	MA	AA	NGS	22.5	ERR10695579	PRJEB58004
16	Musa acuminata; Waigu	MA	AA	NGS	23.6	ERR10695577	PRJEB58004
17	Musa acuminata subsp. truncata; Truncata	MA	AA	NGS	18	ERR10695576	PRJEB58004
18	Musa acuminata subsp. malaccensis; Selangor	MA	AA	NGS	19.6	ERR10695573	PRJEB58004
19	Musa acuminata subsp. malaccensis; Pisang Segun	MA	AA	NGS	21.3	ERR10695572	PRJEB58004
20	Musa acuminata subsp. siamea; Pisang Prentel	MA	AA	NGS	22.4	ERR10695570	PRJEB58004
21	Musa acuminata subsp. siamea; Pa Rayong	MA	AA	NGS	18.6	ERR10695558	PRJEB58004
22	Musa acuminata subsp. burmannicoides; Calcutta 4	MA	AA	NGS	24.1	ERR10695520	PRJEB58004
23	Musa acuminata subsp. malaccensis; Pahang (PT-BA-00267)	MA	AA	NGS	17.2	ERR10695521	PRJEB58004
24	Musa acuminata; Buitenzorg	MA	AA	NGS	21.8	ERR10695532	PRJEB58004
25	Musa acuminata subsp. microcarpa; Khae (Phrae)	MA	AA	NGS	20.1	ERR10695543	PRJEB58004
26	Musa acuminata subsp. microcarpa; Borneo	MA	AA	NGS	19.3	ERR10695531	PRJEB58004
27	Musa acuminata subsp. Malaccensis	MA	AA	NGS	15.6	SRR24350318	PRJNA962682
28	Cavendish	MA	AAA	NGS	16.7	SRR6147593	PRJNA413600
29	Gros Michel	MA	AAA	NGS	31	SRR6996490	PRJNA432894
30	BaXiJiao	MA	AAA	NGS	17.4	SRR6996491	PRJNA432894
31	Cavendish	MA	AAA	NGS	14.5	ERR3412984	PRJEB33317
32	Musa acuminata subgr. Sucrier : Pisang_Mas	MA	AA	NGS	17	SRR6996492	PRJNA432894
33	Musa acuminata subsp. Malaccensis	MA	AA	ONT	19.6	SRR24350320	PRJNA962682
34	Musa acuminata subsp. Malaccensis	MA	AA	PACBIO HIFI	32.4	SRR24350321	PRJNA962682
35	Musa acuminata AAA Group (Cavendish banana ('Baxijiao') )	MA	AAA	ONT	44	SRR24235288	PRJNA957115
36	Musa acuminata AAA Group (Cavendish banana ('Baxijiao') )	MA	AAA	PACBIO HIFI	102.1	SRR24235289	PRJNA957115
	BB type banana genotype
37	Musa balbisiana; Balbisiana Honduras	MB	MB	NGS	22.1	ERR10695529	PRJEB58004
38	Musa balbisiana Cultivar DYN018	MB	BB	NGS	36.2	ERR10695603	PRJEB58004
39	Musa balbisiana Cultivar DYN049 (Butuhan)	MB	BB	NGS	31.5	ERR10695605	PRJEB58004
40	Musa balbisiana Cultivar DYN172 (Lal Velchi)	MB	BB	NGS	34.1	ERR10695608	PRJEB58004
41	Musa balbisiana DH-Pisang Klutuk Wulung	MB	BB	NGS	33.4	SRR6996489	PRJNA432894
42	Musa balbisiana DH-Pisang Klutuk Wulung	MB	BB	NGS	56.9	SRR956987,SRR957627	PRJNA216985
43	Musa balbisiana Cultivar DYN302 (Pisang Klutuk Wulung)	MB	BB	NGS	18.9	ERR10695565	PRJEB58004
44	Musa balbisiana	MB	BB	NGS	20.5	SRR6147592	PRJNA413600
45	Musa balbisiana	MB	BB	NGS	29.6	SRR6996488	PRJNA432894
46	Musa balbisiana	MB	BB	NGS	44.4	SRR8989633, SRR9734079, SRR9850640	PRJNA540118
47	Musa balbisiana	MB	BB	NGS	32.2	ERR3606950	PRJEB35002
48	Musa balbisiana Pisang Klutuk Wulung			PACBIO	59	Source: CNGB Run ( ID CNR0255329 )
	*Species:- MA: Musa acuminata, MB: Musa balbisiana
					1361.7

## Sheet: Stable_4
Supplementary Table 4. Summary of number and change in genes and BUSCO scores at varying Annotated Edit Distance (AED) values of annotated protein coding genes in two Enset (E. ventricosum) landraces
	# predicted protein coding genes		BUSCO after removing TE inserted genes					Change in BUSCO/predicted proteins
Mazia AED value	# before	# after removing TE insertion genes	C	S	D	F	M	▲# pred	▲C	▲S	▲D	▲F	▲M
0-0.20	39497	31382	0.644	0.596	0.048	0.071	0.285	8115 (0.21%)	0.145	0.132	0.013	0.033	-0.178
0-0.25	50601	38940	0.735	0.68	0.055	0.086	0.179	11661 (0.23%)	0.054	0.048	0.006	0.018	-0.072
0-0.30	59448	44816	0.768	0.712	0.056	0.094	0.138	14632 (0.25%)	0.021	0.016	0.005	0.01	-0.031
0-0.35	66605	49585	0.783	0.722	0.061	0.102	0.115	17020 (0.26%)	0.006	0.006	0	0.002	-0.008
0-0.40	72925	53840	0.789	0.728	0.061	0.104	0.107	19085 (0.26%)	0	0	0	0	0
Bedadeti AED value
0-0.20	40283	30903	0.635	0.605	0.03	0.077	0.288	9380 (0.23%)	0.148	0.138	0.01	0.041	-0.189
0-0.25	52106	38624	0.723	0.685	0.038	0.097	0.18	13482 (0.26%)	0.06	0.058	0.002	0.021	-0.081
0-0.30	61446	44771	0.767	0.729	0.038	0.108	0.125	16675 (0.27%)	0.016	0.014	0.002	0.01	-0.026
0-0.35	69090	49585	0.783	0.743	0.04	0.118	0.099	19505 (0.28%)	0	0	0	0	0
0-0.40	75746	53840	0.789	0.748	0.041	0.12	0.091	21906 (0.29%)	-0.006	-0.005	-0.001	-0.002	0.008

## Sheet: Stable_5
Supplementary Table 5. Summary statistics of mapping enset (E. ventricousm) pan-WGS reads against banana genomes (M. acuminata and M. balbisiana)
	Mapping against M. acuminata			Mapping against M. balbisiana
	CDS	Non-CDS	Genome-wide	CDS	Non-CDS	Genome-wide
Total reference sequence (bp)			479218923			457197862
﻿Regions size/percentage of reference	0.091	0.909		0.0823	0.9177
Mapped reference sequences	0.335417		0.646582	0.334537		0.695896
Mapped reads	0.1803	0.8197	1	0.4303	0.5697	1
﻿Mapped reads, both in pair	0.1773	0.7895	0.9668	0.4232	0.554	0.9771
﻿Mean coverage	418.1% ± 2835.2	250.89% ± 2237.9	232.9 ± 1876.8	540.67 ± 1154.5	334.9 ± 1681.8	407 ± 1475
﻿Mean Mapping Quality	55.37	34.59	37.24	54.41	49.59	23.35

## Sheet: Stable_6
Supplementary Table 6. Summary statistics of mapping banana A-subgenome genotypes pan-WGS reads against enset (E. ventricosum, EV) genomes of landrace Mazia and Bedadeti
	Mapping against EV Mazia			Mapping against EV Bedadeti
	CDS	Non-CDS	Genome-wide	CDS	Non-CDS	Genome-wide
Total reference sequence (bp)			540437612			451284018
﻿Regions size/percentage of reference	0.0898	0.9102		0.1023	0.8977
Mapped reference sequences			0.650089			0.689869
Percentage of total mapped reads	0.6119	0.3332	0.9451	0.349	0.604	0.953
﻿Mean coverage	140.6 ± 2563.6	13.1 ± 571.8	24.5 ± 943	532.4 ± 2624.3	144 ± 773.2	183.9 ± 1120.4
﻿Mean Mapping Quality	41.73	38.32	5.27	53.2	36.84	22.2

## Sheet: Stable_7
Supplementary Table 7 Summary statistics of mapping NGS or long reads of banana B-subgenome genotypes against enset (E. ventricosum, EV) genomes of landrace Mazia and Bedadeti
	Mapping against EV Mazia			Mapping EV Bedadeti
Pan Musa species reads	CDS	Non-CDS	Genome-wide	CDS	Non-CDS	Genome-wide
Total reference sequence (bp)			540437612			451284018
﻿Regions size/percentage of reference	0.0898	0.9102		0.1023	0.8977
Percentage of mapped reference sequences			0.59931			0.657146
Percentage of total mapped reads	0.349	0.517	0.914	0.345	0.523	0.911
﻿Mean coverage	39.2 ± 240.5	16.4 ± 162.4	22 ± 184.6	35.7 ± 211.2	18.6 ± 171	127.6 ± 1216.54
﻿Mean Mapping Quality	52.6	31.7	16.3	55.7	35.7	16

## Sheet: Stable_8
Supplementary Table 8. Desciption of Gene Ontolgoy (GO) terms for gene present in either E. ventricosum (EV) landraces but missing in AA-genome and BB-genome Musa species
Count of identified Ensete ventricosum (EV) genes in landrace Mazia	Count of identified Ensete ventricosum (EV) genes in landrace Bedadeti	GO terms	Description of GO terms	GO terms aspects	List of EV Mazia genes	List of EV Bedadeti genes
0	8	GO:0055085,GO:0090662	Transmembrane transport	Biological process		EVBD.1.048019, EVBD.1.048028, EVBD.1.049197, EVBD.1.049209, EVBD.1.049450, EVBD.1.050376, EVBD.1.050398, EVBD.1.050609
2	7	GO:0006355,GO:0032583,GO:0045449,GO:0061019	Regulation of DNA-templated transcription	Biological process	EVMZ.1.001362, EVMZ.1.034414	EVBD.1.047628, EVBD.1.048981, EVBD.1.051033, EVBD.1.051071, EVBD.1.051174, EVBD.1.051220, EVBD.1.051984
1	5	GO:0007165,GO:0023014,GO:0023015,GO:0023016,GO:0023033,GO:0023045	Signal transduction	Biological process	EVMZ.1.004953	EVBD.1.047628, EVBD.1.049926, EVBD.1.050153, EVBD.1.050643, EVBD.1.051563
0	5	GO:0016310	Phosphorylation	Biological process		EVBD.1.047628, EVBD.1.048981, EVBD.1.049926, EVBD.1.050153, EVBD.1.050643
0	5	GO:0000160	phosphorelay Signal transduction system	Biological process		EVBD.1.047628, EVBD.1.048981, EVBD.1.049926, EVBD.1.050153, EVBD.1.051220
2	4	GO:0005975,GO:0044261,GO:0044723	Carbohydrate metabolic process	Biological process	EVMZ.1.031067, EVMZ.1.034041	EVBD.1.045398, EVBD.1.048647, EVBD.1.050286, EVBD.1.051499
0	3	GO:0006519,GO:0006520	Amino acid metabolic process	Biological process		EVBD.1.050388, EVBD.1.051380, EVBD.1.052085
0	3	GO:0006096,GO:0019641,GO:0019642	Glycolytic process	Biological process		EVBD.1.046537, EVBD.1.050786, EVBD.1.051409
0	2	GO:0006094	Gluconeogenesis	Biological process		EVBD.1.050786, EVBD.1.051409
0	2	GO:0006749	Glutathione metabolic process	Biological process		EVBD.1.050419, EVBD.1.050885
0	2	GO:0000105	L-histidine Biosynthetic process	Biological process		EVBD.1.051036, EVBD.1.051693
0	2	GO:0019346	Transsulfuration	Biological process		EVBD.1.051380, EVBD.1.051805
0	2	GO:0016226	iron-sulfur cluster assembly	Biological process		EVBD.1.046365, EVBD.1.051801
0	2	GO:0009089	lysine Biosynthetic process via diaminopimelate	Biological process		EVBD.1.050963, EVBD.1.051929
0	2	GO:0006508	proteolysis	Biological process		EVBD.1.050558, EVBD.1.050678
0	2	GO:0008033	tRNA processing	Biological process		EVBD.1.051067, EVBD.1.051569
1	1	GO:0009058,GO:0044274,GO:0044711	Biosynthetic process	Biological process	EVMZ.1.035356	EVBD.1.050438
2	1	GO:0022904	respiratory electron transport chain	Biological process	EVMZ.1.030453, EVMZ.1.030991	EVBD.1.048962
0	1	GO:0006207	'de novo' pyrimidine nucleobase Biosynthetic process	Biological process		EVBD.1.050890
0	1	GO:0006260,GO:0055133	DNA replication	Biological process		EVBD.1.051178
0	1	GO:0006313,GO:0006317,GO:0006318	DNA transposition	Biological process		EVBD.1.046340
0	1	GO:0001121,GO:0006350,GO:0006351,GO:0061018,GO:0061022	DNA-templated transcription	Biological process		EVBD.1.049004
0	1	GO:0006526	L-arginine Biosynthetic process	Biological process		EVBD.1.051799
0	1	GO:0006736,GO:0009435	NAD Biosynthetic process	Biological process		EVBD.1.048685
0	1	GO:0006116	NADH oxidation	Biological process		EVBD.1.051893
0	1	GO:0006457,GO:0007022,GO:0007024,GO:0007025	Protein folding	Biological process		EVBD.1.051602
0	1	GO:0009073,GO:0016089	aromatic amino acid family Biosynthetic process	Biological process		EVBD.1.050444
0	1	GO:0042952	beta-ketoadipate pathway	Biological process		EVBD.1.050714
0	1	GO:0009082	branched-chain amino acid Biosynthetic process	Biological process		EVBD.1.051294
0	1	GO:0006935	chemotaxis	Biological process		EVBD.1.051563
0	1	GO:0006764,GO:0015937	coenzyme A Biosynthetic process	Biological process		EVBD.1.046411
0	1	GO:0006535	cysteine Biosynthetic process from serine	Biological process		EVBD.1.052085
0	1	GO:0050992	dimethylallyl diphosphate Biosynthetic process	Biological process		EVBD.1.049315
0	1	GO:0022900	electron transport chain	Biological process		EVBD.1.047178
0	1	GO:0000037,GO:0006633	fatty acid Biosynthetic process	Biological process		EVBD.1.051711
0	1	GO:0006106	fumarate metabolic process	Biological process		EVBD.1.050978
0	1	GO:0006012	galactose metabolic process	Biological process		EVBD.1.050339
0	1	GO:0006006	glucose metabolic process	Biological process		EVBD.1.045398
0	1	GO:0006751	glutathione catabolic process	Biological process		EVBD.1.051232
0	1	GO:0046168	glycerol-3-phosphate catabolic process	Biological process		EVBD.1.048647
0	1	GO:0006072	glycerol-3-phosphate metabolic process	Biological process		EVBD.1.048647
0	1	GO:0015969	guanosine tetraphosphate metabolic process	Biological process		EVBD.1.049004
0	1	GO:0030026	intracellular manganese ion homeostasis	Biological process		EVBD.1.051897
0	1	GO:0019288	isopentenyl diphosphate Biosynthetic process, methylerythritol 4-phosphate pathway	Biological process		EVBD.1.049315
0	1		isopentenyl diphosphate Biosynthetic processethylerythritol 4-phosphate pathway	NA		EVBD.1.049315
0	1	GO:0008299,GO:0009241	isoprenoid Biosynthetic process	Biological process		EVBD.1.048636
0	1	GO:0009245	lipid A Biosynthetic process	Biological process		EVBD.1.050627
0	1	GO:0008610	lipid Biosynthetic process	Biological process		EVBD.1.051800
0	1	GO:0030001,GO:0070838,GO:0070839	metal ion transport	Biological process		EVBD.1.049197
0	1	GO:0032259	methylation	Biological process		EVBD.1.051522
0	1	GO:0032324	molybdopterin cofactor Biosynthetic process	Biological process		EVBD.1.050834
0	1	GO:0006139,GO:0055134	nucleobase-containing compound metabolic process	Biological process		EVBD.1.047429
0	1	GO:0006098	pentose-phosphate shunt	Biological process		EVBD.1.045398
0	1	GO:0015833	peptide transport	Biological process		EVBD.1.052011
0	1	GO:0018160,GO:0018354,GO:0033035	peptidyl-pyrromethane cofactor linkage	Biological process		EVBD.1.048760
0	1	GO:0035435	phosphate ion Transmembrane transport	Biological process		EVBD.1.048028
0	1	GO:0006817	phosphate ion transport	Biological process		EVBD.1.048028
0	1	GO:0046837,GO:0046854	phosphatidylinositol phosphate Biosynthetic process	Biological process		EVBD.1.051777
0	1	GO:0010163,GO:0071805	potassium ion Transmembrane transport	Biological process		EVBD.1.050468
0	1	GO:0006411,GO:0019538,GO:0044267,GO:0044268	protein metabolic process	Biological process		EVBD.1.050678
0	1	GO:0006479	protein methylation	Biological process		EVBD.1.051522
0	1	GO:0000413	protein peptidyl-prolyl isomerization	Biological process		EVBD.1.051602
0	1	GO:0015986	proton motive force-driven ATP synthesis	Biological process		EVBD.1.052081
0	1	GO:0006163	purine nucleotide metabolic process	Biological process		EVBD.1.047799
0	1	GO:0000154,GO:0016548	rRNA modification	Biological process		EVBD.1.047798
0	1	GO:0010038	response to metal ion	Biological process		EVBD.1.051110
0	1	GO:0006801	superoxide metabolic process	Biological process		EVBD.1.049711
0	1	GO:0002943	tRNA dihydrouridine synthesis	Biological process		EVBD.1.051569
0	1	GO:0033014	tetrapyrrole Biosynthetic process	Biological process		EVBD.1.048760
0	1	GO:0009228	thiamine Biosynthetic process	Biological process		EVBD.1.046687
0	1	GO:0006415,GO:0006443,GO:0006456	translational termination	Biological process		EVBD.1.051175
0	1	GO:0006099	tricarboxylic acid cycle	Biological process		EVBD.1.050978
0	1	GO:0006744	ubiquinone Biosynthetic process	Biological process		EVBD.1.051066
1	0	GO:0046034	ATP metabolic process	Biological process	EVMZ.1.031976
1	0	GO:0006629	Lipid metabolic process	Biological process	EVMZ.1.004953
1	0	GO:0006468	Protein Phosphorylation	Biological process	EVMZ.1.020353
1	0	GO:0007015	actin filament organization	Biological process	EVMZ.1.026030
1	0	GO:0098869	cellular oxidant detoxification	Biological process	EVMZ.1.012331
1	0	GO:0007018	microtubule-based movement	Biological process	EVMZ.1.048915
1	0	GO:0006334	nucleosome assembly	Biological process	EVMZ.1.049483
1	0	GO:0009401	phosphoenolpyruvate-dependent sugar phosphotransferase system	Biological process	EVMZ.1.030357
1	0	GO:0019684	photosynthesis, light reaction	Biological process	EVMZ.1.023630
1	0	GO:0009767,GO:0009774,GO:0009775,GO:0009776	photosynthetic electron transport chain	Biological process	EVMZ.1.023630
1	0	GO:0010155	regulation of proton transport	Biological process	EVMZ.1.034107
1	0	GO:0006412,GO:0006416,GO:0006453,GO:0043037	translation	Biological process	EVMZ.1.012668
1	0	GO:0006899,GO:0016192	vesicle-mediated transport	Biological process	EVMZ.1.028113
2	0	GO:0015074	DNA integration	Biological process	EVMZ.1.036062, EVMZ.1.047945
2	0	GO:0007242,GO:0007243,GO:0023013,GO:0023034,GO:0035556	Intracellular Signal transduction	Biological process	EVMZ.1.004953, EVMZ.1.014815
2	0	GO:0043248	Proteasome assembly	Biological process	EVMZ.1.038313, EVMZ.1.039928
2	0	GO:0006818,GO:0015991,GO:0015992,GO:1902600	Proton Transmembrane transport	Biological process	EVMZ.1.031976, EVMZ.1.045525
2	0	GO:0006891	intra-Golgi vesicle-mediated transport	Biological process	EVMZ.1.024290, EVMZ.1.033759

## Sheet: Stable_9
Supplementary table 9. Desciption of Gene Ontolgoy (GO) terms for gene present in either of Musa species (Musa acuminata [MA] and Musa balbisiana [MB]) & absent in E. ventricosum (EV) landrace Mazia and Bedadeti
Count of identified Musa acuminata (MA) specific genes	Count of identified Musa balbisiana (BA) specific genes	GO terms	Description of GO terms	GO terms aspects	MA gene list	MB gene list
24	8	GO:0002217,GO:0006952,GO:0042829	defense response	biological_process	Macma4_03_g08400.1, Macma4_03_g08410.1, Macma4_03_g08420.1, Macma4_03_g24790.1, Macma4_03_g24810.1, Macma4_03_g24820.1, Macma4_03_g24910.1, Macma4_03_g30600.1, Macma4_04_g35020.1, Macma4_06_g39450.1, Macma4_07_g22990.1, Macma4_07_g23000.1, Macma4_07_g23010.1, Macma4_07_g23020.1, Macma4_07_g23030.1, Macma4_07_g23050.1, Macma4_07_g23060.1, Macma4_07_g23080.1, Macma4_09_g02440.1, Macma4_09_g02770.1,…	Mba01_g04150.1, Mba03_g08030.1, Mba03_g08040.1, Mba03_g08050.1, Mba07_g20350.1, Mba09_g15060.1, Mba09_g20560.1, Mba10_g21740.1
19	12	GO:0006355,GO:0032583,GO:0045449,GO:0061019	regulation of DNA-templated transcription	biological_process	Macma4_01_g27200.1, Macma4_02_g00990.1, Macma4_02_g02320.1, Macma4_02_g02330.1, Macma4_04_g03030.1, Macma4_05_g21260.1, Macma4_05_g33340.1, Macma4_06_g12890.1, Macma4_06_g27730.1, Macma4_06_g39300.1, Macma4_07_g02130.1, Macma4_07_g19020.1, Macma4_07_g19030.1, Macma4_08_g15540.1, Macma4_09_g02550.1, Macma4_10_g01760.1, Macma4_10_g06430.1, Macma4_10_g20860.1, Macma4_10_g23720.1	Mba00_g19280.1, Mba02_g01250.1, Mba02_g09630.1, Mba05_g19880.1, Mba05_g31290.1, Mba06_g11890.1, Mba06_g25820.1, Mba07_g02130.1, Mba08_g15130.1, Mba10_g01120.1, Mba10_g17360.1, Mba11_g21100.1
18	10	GO:0006468	protein phosphorylation	biological_process	Macma4_02_g14540.1, Macma4_02_g14550.1, Macma4_03_g18970.1, Macma4_03_g35050.1, Macma4_04_g22330.1, Macma4_04_g22360.1, Macma4_04_g23790.1, Macma4_04_g38490.1, Macma4_05_g13260.1, Macma4_05_g13270.1, Macma4_05_g13330.1, Macma4_05_g13340.1, Macma4_05_g13350.1, Macma4_05_g13360.1, Macma4_08_g00050.1, Macma4_08_g16210.1, Macma4_09_g23990.1, Macma4_10_g06360.1	Mba01_g00220.1, Mba02_g12210.1, Mba04_g21370.1, Mba04_g22640.1, Mba05_g04920.1, Mba05_g27220.1, Mba08_g00060.1, Mba09_g19180.1, Mba10_g02300.1, Mba10_g26810.1
8	6	GO:0006508	proteolysis	biological_process	Macma4_04_g11300.1, Macma4_04_g26290.1, Macma4_04_g37330.1, Macma4_04_g37340.1, Macma4_05_g18410.1, Macma4_05_g18420.1, Macma4_08_g12780.1, Macma4_10_g06930.1	Mba04_g01290.1, Mba04_g10410.1, Mba04_g25020.1, Mba08_g12390.1, Mba09_g17710.1, Mba10_g03100.1
8	9	GO:0055085,GO:0090662	transmembrane transport	biological_process	Macma4_03_g22600.1, Macma4_03_g22610.1, Macma4_03_g22680.1, Macma4_05_g19270.1, Macma4_07_g12840.1, Macma4_07_g18230.1, Macma4_08_g16030.1, Macma4_11_g01860.1	Mba03_g15300.1, Mba03_g21400.1, Mba05_g18230.1, Mba05_g18240.1, Mba07_g11590.1, Mba07_g16340.1, Mba10_g00650.1, Mba11_g01740.1, Mba11_g05640.1
6	3	GO:0006886,GO:0032779	intracellular protein transport	biological_process	Macma4_01_g24400.1, Macma4_02_g23290.1, Macma4_03_g09480.1, Macma4_05_g31730.1, Macma4_07_g18460.1, Macma4_10_g14450.1	Mba01_g31690.1, Mba02_g20460.1, Mba05_g29820.1
6	4	GO:0006412,GO:0006416,GO:0006453,GO:0043037	translation	biological_process	Macma4_05_g25960.1, Macma4_06_g04440.1, Macma4_06_g21380.1, Macma4_06_g21390.1, Macma4_06_g27760.1, Macma4_07_g06700.1	Mba04_g18370.1, Mba06_g25880.1, Mba10_g22540.1, Mba11_g10040.1
4	3	GO:0006629	lipid metabolic process	biological_process	Macma4_02_g11800.1, Macma4_02_g11810.1, Macma4_10_g07640.1, Macma4_11_g01620.1	Mba02_g00650.1, Mba07_g15120.1, Mba10_g03590.1
4	4	GO:0009738	abscisic acid-activated signaling pathway	biological_process	Macma4_03_g08400.1, Macma4_03_g08410.1, Macma4_03_g08420.1, Macma4_09_g16630.1	Mba03_g08030.1, Mba03_g08040.1, Mba03_g08050.1, Mba09_g15060.1
3	1	GO:0006121	mitochondrial electron transport, succinate to ubiquinone	biological_process	Macma4_03_g30270.1, Macma4_03_g30290.1, Macma4_03_g30310.1	Mba01_g04400.1
3	1	GO:0006433	prolyl-tRNA aminoacylation	biological_process	Macma4_03_g31150.1, Macma4_07_g07870.1, Macma4_07_g07880.1	Mba01_g03660.1
3	1	GO:0006099	tricarboxylic acid cycle	biological_process	Macma4_03_g30270.1, Macma4_03_g30290.1, Macma4_03_g30310.1	Mba01_g04400.1
3	2	GO:0001121,GO:0006350,GO:0006351,GO:0061018,GO:0061022	DNA-templated transcription	biological_process	Macma4_01_g00270.1, Macma4_01_g00280.1, Macma4_01_g00290.1	Mba03_g22520.1, Mba05_g07810.1
3	2	GO:0009765	photosynthesis, light harvesting	biological_process	Macma4_10_g35350.1, Macma4_10_g35380.1, Macma4_10_g35390.1	Mba10_g27440.1, Mba10_g27460.1
2	0	GO:0009308,GO:0044106	amine metabolic process	biological_process	Macma4_08_g03170.1, Macma4_08_g14450.1	NA
2	0	GO:0046621	negative regulation of organ growth	biological_process	Macma4_02_g13280.1, Macma4_02_g13300.1	NA
2	0	GO:0006457,GO:0007022,GO:0007024,GO:0007025	protein folding	biological_process	Macma4_04_g21860.1, Macma4_05_g09170.1	NA
2	0	GO:0016567	protein ubiquitination	biological_process	Macma4_02_g13280.1, Macma4_02_g13300.1	NA
2	0	GO:0006414,GO:0006442,GO:0006455	translational elongation	biological_process	Macma4_09_g19420.1, Macma4_10_g01770.1	NA
2	1	GO:0006394,GO:0006396	RNA processing	biological_process	Macma4_06_g26320.1, Macma4_11_g00570.1	Mba11_g00480.1
2	1	GO:0007034	vacuolar transport	biological_process	Macma4_10_g16040.1, Macma4_10_g16050.1	Mba10_g10720.1
2	1	GO:0006899,GO:0016192	vesicle-mediated transport	biological_process	Macma4_01_g24400.1, Macma4_10_g14450.1	Mba01_g31690.1
2	2	GO:0006486,GO:0065006	protein glycosylation	biological_process	Macma4_06_g26840.1, Macma4_10_g19530.1	Mba06_g24950.1, Mba10_g13750.1
2	3	GO:0006096,GO:0019641,GO:0019642	glycolytic process	biological_process	Macma4_03_g34700.1, Macma4_10_g14520.1	Mba01_g00520.1, Mba05_g19890.1, Mba09_g11900.1
1	0	GO:0042732	D-xylose metabolic process	biological_process	Macma4_07_g10400.1	NA
1	0	GO:0048193	Golgi vesicle transport	biological_process	Macma4_10_g14450.1	NA
1	0	GO:0030042	actin filament depolymerization	biological_process	Macma4_07_g17050.1	NA
1	0	GO:0006422	aspartyl-tRNA aminoacylation	biological_process	Macma4_10_g06850.1	NA
1	0	GO:0010315	auxin export across the plasma membrane	biological_process	Macma4_08_g16030.1	NA
1	0	GO:0042545	cell wall modification	biological_process	Macma4_08_g35900.1	NA
1	0	GO:0009972	cytidine deamination	biological_process	Macma4_03_g35140.1	NA
1	0	GO:0006888,GO:0048221	endoplasmic reticulum to Golgi vesicle-mediated transport	biological_process	Macma4_01_g10590.1	NA
1	0	GO:0040029	epigenetic regulation of gene expression	biological_process	Macma4_10_g07490.1	NA
1	0	GO:0006749	glutathione metabolic process	biological_process	Macma4_10_g01880.1	NA
1	0	GO:0045017	glycerolipid biosynthetic process	biological_process	Macma4_09_g00190.1	NA
1	0	GO:0006724,GO:0016042,GO:0044240	lipid catabolic process	biological_process	Macma4_04_g04650.1	NA
1	0	GO:0006397	mRNA processing	biological_process	Macma4_11_g13630.1	NA
1	0	GO:0009086	methionine biosynthetic process	biological_process	Macma4_06_g33030.1	NA
1	0	GO:0006812,GO:0006819,GO:0015674,GO:0072512	monoatomic cation transport	biological_process	Macma4_04_g23180.1	NA
1	0	GO:0051169	nuclear transport	biological_process	Macma4_03_g09480.1	NA
1	0	GO:0000160	phosphorelay signal transduction system	biological_process	Macma4_03_g25590.1	NA
1	0	GO:0006470	protein dephosphorylation	biological_process	Macma4_03_g34780.1	NA
1	0	GO:0006605	protein targeting	biological_process	Macma4_07_g18460.1	NA
1	0	GO:0015986	proton motive force-driven ATP synthesis	biological_process	Macma4_11_g00640.1	NA
1	0	GO:0006364,GO:0006365	rRNA processing	biological_process	Macma4_02_g18320.1	NA
1	0	GO:0009733	response to auxin	biological_process	Macma4_10_g06770.1	NA
1	0	GO:0008295	spermidine biosynthetic process	biological_process	Macma4_09_g18830.1	NA
1	0	GO:0006597	spermine biosynthetic process	biological_process	Macma4_09_g18830.1	NA
1	0	GO:1902358	sulfate transmembrane transport	biological_process	Macma4_03_g22680.1	NA
1	0	GO:0006418	tRNA aminoacylation for protein translation	biological_process	Macma4_10_g06850.1	NA
1	0	GO:0010048	vernalization response	biological_process	Macma4_10_g07490.1	NA
1	0	GO:1990961	xenobiotic detoxification by transmembrane export across the plasma membrane	biological_process	Macma4_07_g12840.1	NA
1	1	GO:0006281	DNA repair	biological_process	Macma4_02_g01050.1	Mba02_g00280.1
1	1	GO:0019673	GDP-mannose metabolic process	biological_process	Macma4_11_g07090.1	Mba11_g06400.1
1	1	GO:0006116	NADH oxidation	biological_process	Macma4_04_g42500.1	Mba04_g40120.1
1	1	GO:0009451,GO:0016547	RNA modification	biological_process	Macma4_11_g00570.1	Mba11_g00480.1
1	1	GO:0006614	SRP-dependent cotranslational protein targeting to membrane	biological_process	Macma4_06_g04350.1	Mba06_g03760.1
1	1	GO:0003333	amino acid transmembrane transport	biological_process	Macma4_08_g14910.1	Mba08_g14520.1
1	1	GO:0006284	base-excision repair	biological_process	Macma4_02_g01050.1	Mba02_g00280.1
1	1	GO:0046513	ceramide biosynthetic process	biological_process	Macma4_09_g18840.1	Mba09_g17260.1
1	1	GO:0000724,GO:0016924	double-strand break repair via homologous recombination	biological_process	Macma4_07_g10280.1	Mba07_g09240.1
1	1	GO:0030026	intracellular manganese ion homeostasis	biological_process	Macma4_06_g40650.1	Mba06_g37480.1
1	1	GO:0000398,GO:0006374,GO:0006375	mRNA splicing, via spliceosome	biological_process	Macma4_08_g17480.1	Mba01_g30460.1
1	1	GO:0007064	mitotic sister chromatid cohesion	biological_process	Macma4_06_g33460.1	Mba06_g31030.1
1	1	GO:0045900	negative regulation of translational elongation	biological_process	Macma4_06_g04350.1	Mba06_g03760.1
1	1	GO:0008612,GO:0046515	peptidyl-lysine modification to peptidyl-hypusine	biological_process	Macma4_10_g22000.1	Mba10_g15820.1
1	1	GO:0015914	phospholipid transport	biological_process	Macma4_10_g01380.1	Mba10_g00830.1
1	1	GO:0015979	photosynthesis	biological_process	Macma4_Mt_g01030.1	Mba10_g08320.1
1	1	GO:0042753	positive regulation of circadian rhythm	biological_process	Macma4_10_g10230.1	Mba10_g05890.1
1	1	GO:0006606	protein import into nucleus	biological_process	Macma4_05_g31730.1	Mba05_g29820.1
1	1	GO:0045048	protein insertion into ER membrane	biological_process	Macma4_03_g02080.1	Mba03_g02010.1
1	1	GO:0006818,GO:0015991,GO:0015992,GO:1902600	proton transmembrane transport	biological_process	Macma4_04_g22280.1	Mba06_g22610.1
1	1	GO:0001522	pseudouridine synthesis	biological_process	Macma4_11_g00570.1	Mba11_g00480.1
1	1	GO:0006357,GO:0006358,GO:0010551	regulation of transcription by RNA polymerase II	biological_process	Macma4_06_g25290.1	Mba02_g23540.1
1	1	GO:0031047	regulatory ncRNA-mediated gene silencing	biological_process	Macma4_05_g32730.1	Mba05_g30750.1
1	1	GO:0009627	systemic acquired resistance	biological_process	Macma4_10_g02260.1	Mba10_g01530.1
1	2	GO:0005975,GO:0044261,GO:0044723	carbohydrate metabolic process	biological_process	Macma4_05_g27200.1	Mba05_g25700.1, Mba06_g15660.1
1	2	GO:0006869	lipid transport	biological_process	Macma4_04_g29860.1	Mba04_g17860.1, Mba04_g28420.1
1	4	GO:0009058,GO:0044274,GO:0044711	biosynthetic process	biological_process	Macma4_02_g21170.1	Mba02_g18390.1, Mba03_g15270.1, Mba04_g19460.1, Mba05_g19240.1
0	1	GO:0006526	L-arginine biosynthetic process	biological_process	NA	Mba02_g01400.1
0	1	GO:0019277	UDP-N-acetylgalactosamine biosynthetic process	biological_process	NA	Mba01_g29540.1
0	1	GO:0006519,GO:0006520	amino acid metabolic process	biological_process	NA	Mba05_g19240.1
0	1	GO:0006914,GO:0016238	autophagy	biological_process	NA	Mba04_g40020.1
0	1	GO:0042546	cell wall biogenesis	biological_process	NA	Mba07_g11790.1
0	1	GO:0006821	chloride transport	biological_process	NA	Mba05_g18240.1
0	1	GO:0016554	cytidine to uridine editing	biological_process	NA	Mba05_g17270.1
0	1	GO:0008610	lipid biosynthetic process	biological_process	NA	Mba02_g00650.1
0	1	GO:0007017	microtubule-based process	biological_process	NA	Mba06_g03750.1
0	1	GO:0140021	mitochondrial ADP transmembrane transport	biological_process	NA	Mba03_g15300.1
0	1	GO:1990544	mitochondrial ATP transmembrane transport	biological_process	NA	Mba03_g15300.1
0	1	GO:0032981	mitochondrial respiratory chain complex I assembly	biological_process	NA	Mba08_g15120.1
0	1	GO:0042128	nitrate assimilation	biological_process	NA	Mba05_g11910.1
0	1	GO:0006809	nitric oxide biosynthetic process	biological_process	NA	Mba05_g11910.1
0	1	GO:0009143	nucleoside triphosphate catabolic process	biological_process	NA	Mba04_g29110.1
0	1	GO:0006289,GO:0045001	nucleotide-excision repair	biological_process	NA	Mba05_g07810.1
0	1	GO:0009767,GO:0009774,GO:0009775,GO:0009776	photosynthetic electron transport chain	biological_process	NA	Mba00_g08030.1
0	1	GO:0009772	photosynthetic electron transport in photosystem II	biological_process	NA	Mba00_g14420.1
0	1	GO:0070476	rRNA (guanine-N7)-methylation	biological_process	NA	Mba06_g31670.1
0	1	GO:0019953	sexual reproduction	biological_process	NA	Mba04_g24760.1
0	2	GO:0015696,GO:0072488	ammonium transmembrane transport	biological_process	NA	Mba04_g23930.1
0	2	GO:0019684	photosynthesis, light reaction	biological_process	NA	Mba00_g08030.1, Mba00_g14420.1

## Sheet: Stable_10
Supplementary Table 10. NLR loci in Mazia genome that do not have BLASTN homology to sequences in M. acumunata or M. balbisiana genome
Genome	Contig name	start	end
EV mazia (GCA_052324855.1)	Contig_229	66099	68134
	Contig_1461	4401	4719
	Contig_831	49508	49786
	Contig_465	5111	6605
	Contig_1647	7575	8798
EV bedadeti (GCA_000818735.3)	JTFG02004307.1	24533	26020
	JTFG02021585.1	2387	3610
	JTFG02023593.1	802	1245
	JTFG02006909.1	9253	11288
	JTFG02011417.1	2067	2345
	JTFG02000258.1	38487	38743
					Contig name	start	end	starnd
					Contig_229	66099	68134	-
					Contig_1461	4401	4719	-
					Contig_831	49508	49786	+
					Contig_465	5111	6605	-
					Contig_465	5111	6605	-
					Contig_465	5111	6605	-
					Contig_15	1295305	1300337	+
					Contig_413	236001	238857	-
					Contig_1647	7575	8798	-
					Genome

[truncated: 8 more sheets: Stable_11, Stable_12, Stable_13, Stable_14, Stable_15, NLR_Loci_Nucleotide, NLR_Genes_Protein, Stable_150_tobe_del]
